# Supplementary material for: Molecular investigation of tick-borne pathogens in ticks removed from tick-bitten humans in the southwestern region of the Republic of Korea
Source: PubMed Central journal article supplement (PMC8205137; doi:10.1371/journal.pone.0252992), 2021-06-15
Supplement: pone.0252992.s001.pdf [file pone.0252992.s001.pdf]

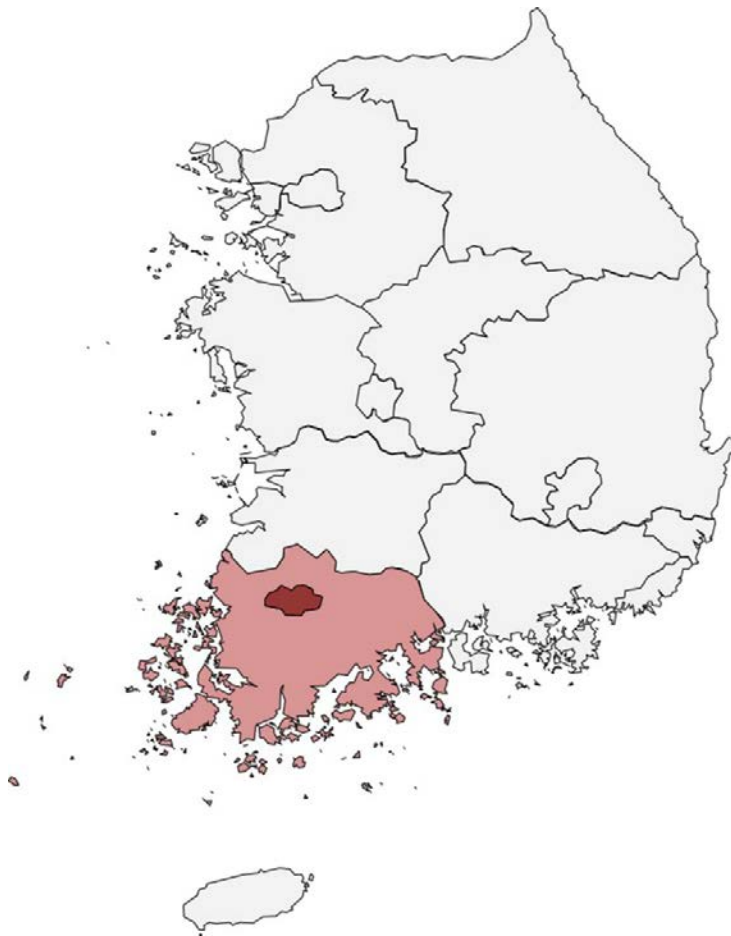

**S1 Fig. Location surveyed for ticks from tick-bitten patients in the southwest provinces of the ROK.** Dark red color, Gwangju Metropolitan City and Chosun University Hospital located in this area; light red color, Jeollanam Provinces
